# Supplementary material for: Sleep Duration is Inversely Associated with Serum Uric Acid Concentrations and Uric Acid to Creatinine Ratio in an Elderly Mediterranean Population at High Cardiovascular Risk
Source: MDPI journal article supplement (doi:10.3390/nu11040761), 2019-04-01
Supplement: s1 [file s1]

**Supplemental Table S1.** Spearman's correlation analysis between uric acid, creatinine, and leukocytes.

|            | Uric acid | Creatinine | Leukocytes |
|------------|-----------|------------|------------|
| Uric acid  | 1         |            |            |
| Creatinine | 0.37 *    | 1          |            |
| Leukocytes | 0.11 *    | 0.12 *     | 1          |

\*  $p$  value < 0.05.
